# Supplementary material for: Tumor Cell-associated Exosomes Robustly Elicit Anti-tumor Immune Responses through Modulating Dendritic Cell Vaccines in Lung Tumor
Source: PubMed Central journal article supplement (PMC6990923; doi:10.7150/ijbs.38414), 2020-01-14
Supplement: ijbsv16p0633s1.pdf [file ijbsv16p0633s1.pdf]

## Supplementary data

Fig.S1

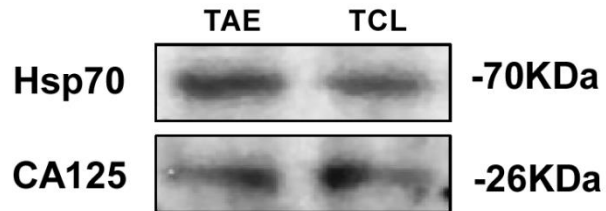

**Fig. S1. The enrichment of tumor-associated antigens of tumor-associated exosomes.**

Western blots for examining levels of lung-specific antigens in A549 TAEs. Total protein (20 $\mu$ g) was loaded for A549 TCLs and TAEs to measure the expression of heat shock protein 70 (Hsp70) and CA125. A549 TCLs and TAEs loading used are noted in the image.
